# Supplementary material for: Endothelial Progenitor Cells as Prognostic Markers of Preterm Birth‐Associated Complications
Source: PubMed Central journal article supplement (PMC5442749; doi:10.5966/sctm.2016-0085), 2016-07-27
Supplement: SCT3-6-007-s001.pdf [file SCT3-6-007-s001.pdf]

**RUNNING TITLE: ENDOTHELIAL PROGENITOR CELLS AND  
PREMATURITY**

**PERSPECTIVES**

**ENDOTHELIAL PROGENITOR CELLS AS PROGNOSTIC MARKERS OF  
PRETERM BIRTH-ASSOCIATED COMPLICATIONS: A SYSTEMATIC  
REVIEW**

Mariane Bertagnolli PhD<sup>1</sup>; Anne Monique Nuyt MD<sup>1</sup>; Bernard Thébaud MD, PhD<sup>2</sup>;  
Thuy Mai Luu MD<sup>1</sup>

<sup>1</sup> Department of Pediatrics, Sainte-Justine University Hospital Research Center,  
Université de Montréal, Montreal, Canada

<sup>2</sup> Department of Pediatrics, Ottawa Hospital Research Institute, University of Ottawa,  
Ottawa, Canada

**SUPPLEMENTAL MATERIAL**

Supplemental Material Table S1 - Full search strategy

Supplemental Material Table S2 - Adapted Newcastle-Ottawa Quality Assessment Scale

**Supplemental Material: Table S1 - Full search strategy**

|   |                           |                                                                                                                                                                                                                                                                                                                                                                                                                                                                                                                                                                                                                                                                                                                                                                                                                                                                                                                                                       |
|---|---------------------------|-------------------------------------------------------------------------------------------------------------------------------------------------------------------------------------------------------------------------------------------------------------------------------------------------------------------------------------------------------------------------------------------------------------------------------------------------------------------------------------------------------------------------------------------------------------------------------------------------------------------------------------------------------------------------------------------------------------------------------------------------------------------------------------------------------------------------------------------------------------------------------------------------------------------------------------------------------|
| 1 | Preterm birth (unlimited) | <p>((preterm*[TIAB] OR pre-term*[TIAB] OR micropreterm*[TIAB] OR prematur*[TIAB] OR pre-matur*[TIAB] OR preemie*[TIAB] OR low birth weight[TIAB] OR lowbirth weight[TIAB] OR lbw*[TIAB] OR vlbw*[TIAB] OR elbw*[TIAB] OR term-equivalent age[TIAB] OR small for date[TIAB]) OR ((neonat*[TIAB] OR neo-nat*[TIAB] OR newborn*[TIAB] OR new-born*[TIAB] OR infant*[TIAB] OR baby[TIAB] OR babies[TIAB] OR gestational*[TIAB]) AND (underweight[TIAB] OR under-weight[TIAB] OR SGA[TIAB] OR small for[TIAB]))) OR ((preterm*[OT] OR pre-term*[OT] OR micropreterm*[OT] OR prematur*[OT] OR pre-matur*[OT] OR preemie*[OT] OR low birth weight[OT] OR lowbirth weight[OT] OR lbw*[OT] OR vlbw*[OT] OR elbw*[OT] OR term-equivalent age[OT] OR small for date[OT]) OR ((neonat*[OT] OR neo-nat*[OT] OR newborn*[OT] OR new-born*[OT] OR infant*[OT] OR baby[OT] OR babies[OT] OR gestational*[OT]) AND (underweight[OT] OR under-weight[OT] OR SGA[OT]</p> |
|---|---------------------------|-------------------------------------------------------------------------------------------------------------------------------------------------------------------------------------------------------------------------------------------------------------------------------------------------------------------------------------------------------------------------------------------------------------------------------------------------------------------------------------------------------------------------------------------------------------------------------------------------------------------------------------------------------------------------------------------------------------------------------------------------------------------------------------------------------------------------------------------------------------------------------------------------------------------------------------------------------|

|   |                                           |                                                                                                                                                                                                                                         |
|---|-------------------------------------------|-----------------------------------------------------------------------------------------------------------------------------------------------------------------------------------------------------------------------------------------|
|   |                                           | OR small for[OT]))))                                                                                                                                                                                                                    |
| 2 | Preterm birth (controlled)                | Infant, Premature[MH] OR Infant, Extremely Premature[MH] OR Premature Birth[MH] OR Infant, Low Birth Weight[MH] OR Infant, Very Low Birth Weight[MH] OR Infant, Extremely Low Birth Weight[MH] OR Infant, Small for Gestational Age[MH] |
| 3 |                                           | #1 OR #2                                                                                                                                                                                                                                |
| 4 | endothelial progenitor cells (unlimited)  | (endotheli*[TIAB] AND (progenitor*[TIAB] OR stem[TIAB] OR colony-forming[TIAB])) OR (endotheli*[OT] AND (progenitor*[OT] OR stem[OT] OR colony-forming[OT]))                                                                            |
| 5 | endothelial progenitor cells (controlled) | Endothelial Progenitor Cells[MH] OR Endothelial Cells[MH:NOEXP]                                                                                                                                                                         |
| 6 |                                           | #4 OR #5                                                                                                                                                                                                                                |
| 7 |                                           | (#3 AND #6) AND (1994:2016[DP] AND (english[LA] OR french[LA]))                                                                                                                                                                         |

**Supplemental Material: Table S2 - Adapted Newcastle-Ottawa Quality Assessment Scale**

A study can be awarded a maximum of one star for each numbered item within the Selection categories. A maximum of two stars can be given for Comparability. A maximum of three stars can be given for the first category for Outcome and one star for the second category for Outcome.

**A) SELECTION (Maximum of 4 stars)**

**A1) Cohort study design**

1) Representativeness of the exposed cohort

- a) truly representative of the average preterm population\*
- b) somewhat representative of the average preterm population in the community\*
- c) selected group of users
- d) no description of the derivation of the cohort

2) Selection of the non-exposed cohort

- a) drawn from the same community as the exposed cohort\*
- b) drawn from a different source
- c) no description of the derivation of the non-exposed cohort

3) Ascertainment of preterm status

- a) secure record (e.g. birth records)\*
- b) written self-report

c) not mentioned

4) Demonstration that outcome of interest was not present at the beginning of the study

a) yes\*

b) no or not mentioned

## **A2) Case-control design**

1) Is the case definition adequate?

a) yes, with independent validation\*

b) yes, e.g. record linkage or based on self-reports

c) no description

2) Representativeness of the cases

a) consecutive or obviously representative series of cases\*

b) potential for selection biases or not stated

3) Selection of controls

a) controls are derived from the same cohort\*

b) controls are derived from a different cohort

c) no description

4) Definition of controls

a) no history of disease\*

b) no description of source

**B) COMPARABILITY (Maximum of 2 stars)**

1) Comparability of cohorts on the basis of analysis

- a) study controls for age (EPC analysis performed at the same chronological time)\*
- b) study controls for sex\*

**C) OUTCOME (Maximum 4 stars)**

1) Assessment of outcome (Maximum 3 stars)

1a) Were EPCs identified correctly?

- a) right cells selected (CD34+, VEGFR2+ and CD45- assessed by flow cytometry)\*
- b) cells grown in culture to look at colony-forming capacity\*
- c) assessment of angiogenic capacity (in vitro or in vivo)\*
- d) unconventional technique
- e) no description at all

1b) Was technician blinded to neonatal history?

a) yes\*

b) no
